# Supplementary material for: Highly stable magic angle spinning spherical rotors
Source: Copernicus journal article supplement (doi:10.5194/mr-1-97-2020), 2020-06-18
Supplement: Supplementary file 2 [file mr-1-97-2020-supplement.zip]

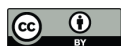

*Supplement of*

## **Highly stable magic angle spinning spherical rotors**

**Thomas M. Osborn Popp et al.**

*Correspondence to:* Alexander Barnes ([alexander.barnes@phys.chem.ethz.ch](mailto:alexander.barnes@phys.chem.ethz.ch))

- [mr-1-97-2020-supplement-title-page.pdf](#)
- [supplementary\\_material\\_mathematica.nb](#)
- [supplementary\\_material\\_mathematica\\_pdfpreview.pdf](#)

The copyright of individual parts of the supplement might differ from the CC BY 4.0 License.
